# Supplementary material for: FIBCD1 is an endocytic GAG receptor associated with a novel neurodevelopmental disorder
Source: PubMed Central journal article supplement (PMC9449597; doi:10.15252/emmm.202215829), 2022-08-02

# APPENDIX

Table of Contents:

Appendix Figure S1

## Appendix Figure S1: Additional RNA-seq analysis

(A) z-score hierarchical clustering for each sample in *Fibcd1* KO vs WT, WT<sup>CSPG</sup> vs WT and KO<sup>CSPG</sup> vs KO. Colours represent scaled expression values, with blue for low and red for high expression levels. Z-score is indicated in the legend. (B) Volcano plot depicting DEGs at DIV2 hippocampal cultures, comparing *Fibcd1* KO vs WT, showing significantly upregulated (red) and downregulated (blue) genes. Top 20 DEGs are labelled. (C) Volcano plot depicting DEGs at DIV2 hippocampal cultures comparing WT<sup>CSPG</sup> vs WT, all genes that fall into “integrin binding” GO term category are labelled.

Appendix Figure S1

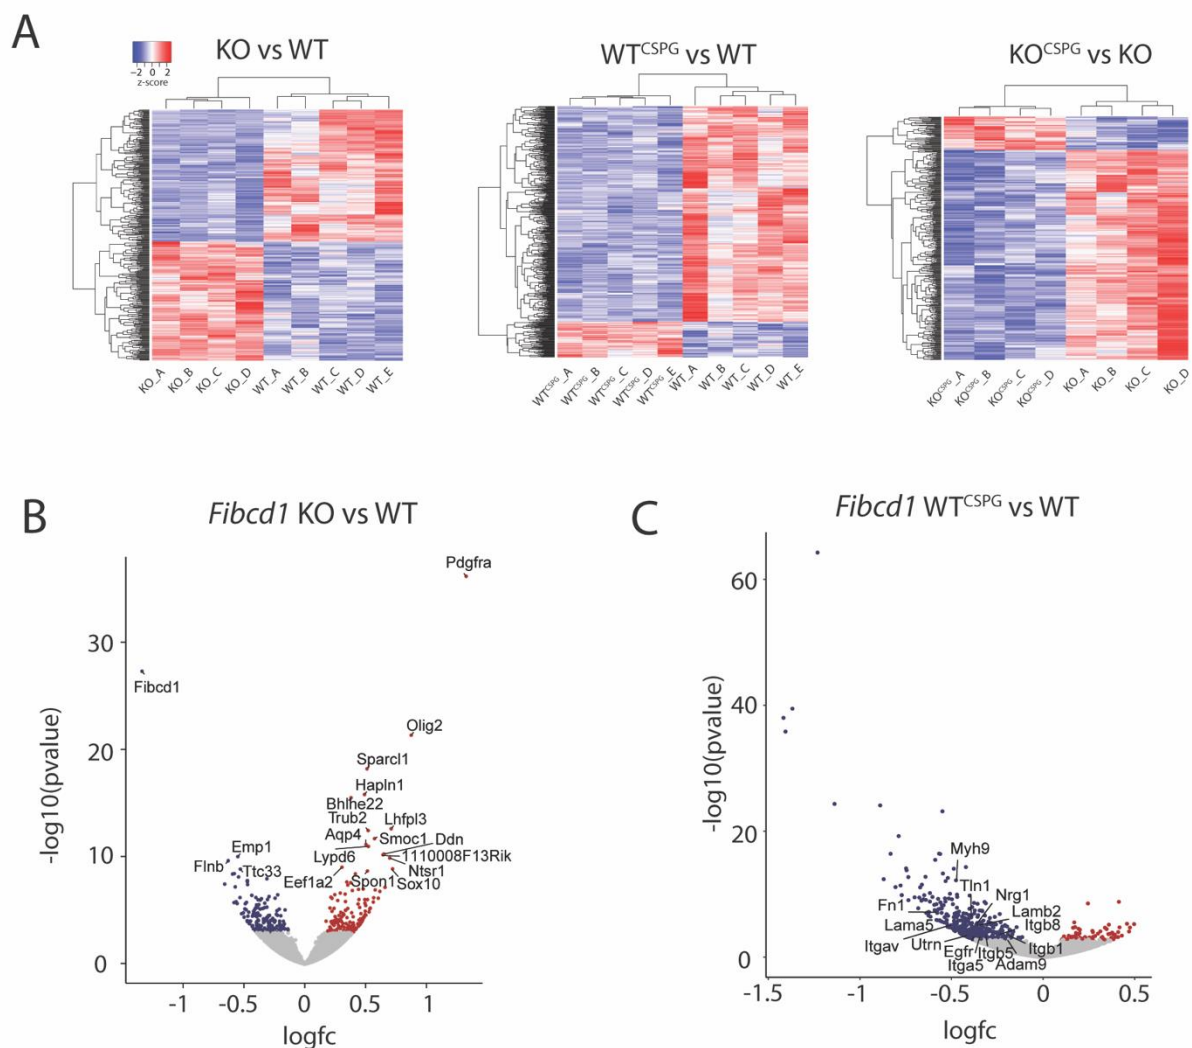

Supplement: EMMM-14-e15829-s003.pdf [file EMMM-14-e15829-s003.pdf]
